# Supplementary material
Source: Springer Nature journal article supplement (https://www.springermedizin.de/resource/supplementary/12913_2012_2593_MOESM2_ESM.docx/9531008)
Supplement: MOESM2 [file 9531008]

## Table 2: Users and providers experiences on maternal care

| **Users’ experiences** | **Providers’ experiences** |
| --- | --- |
| 1. Missing drugs and blood transfusion 2. Missing attention, support and care 3. Experiencing physical and verbal abuse | 1. Lacking supportive supervision and supplies 2. Lacking motivation to work effectively |
